# Supplementary material for: Integrative multi-platform meta-analysis of gene expression profiles in pancreatic ductal adenocarcinoma patients for identifying novel diagnostic biomarkers
Source: PubMed Central journal article supplement (PMC5884535; doi:10.1371/journal.pone.0194844), 2018-04-04

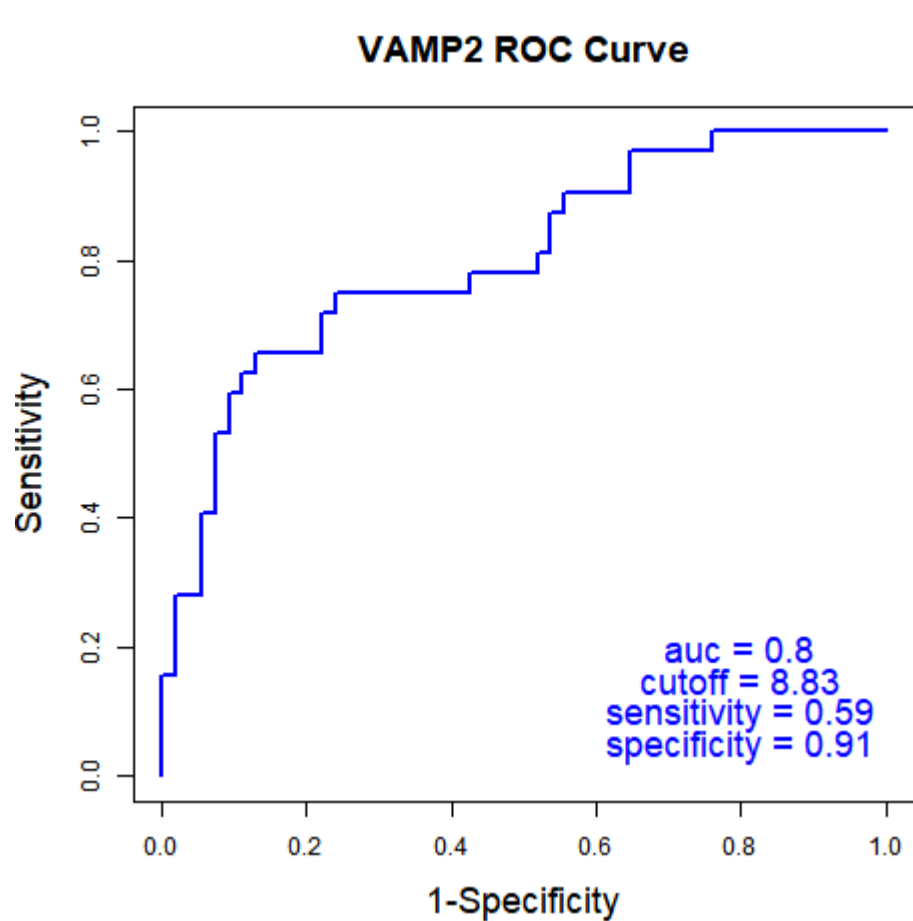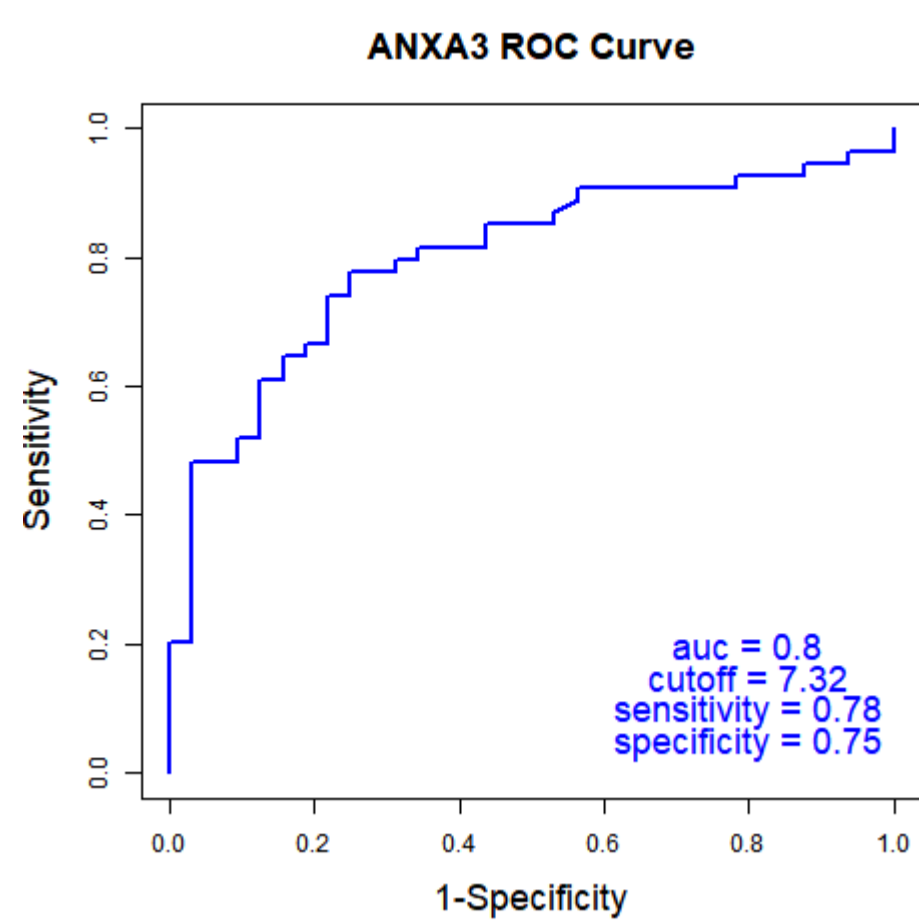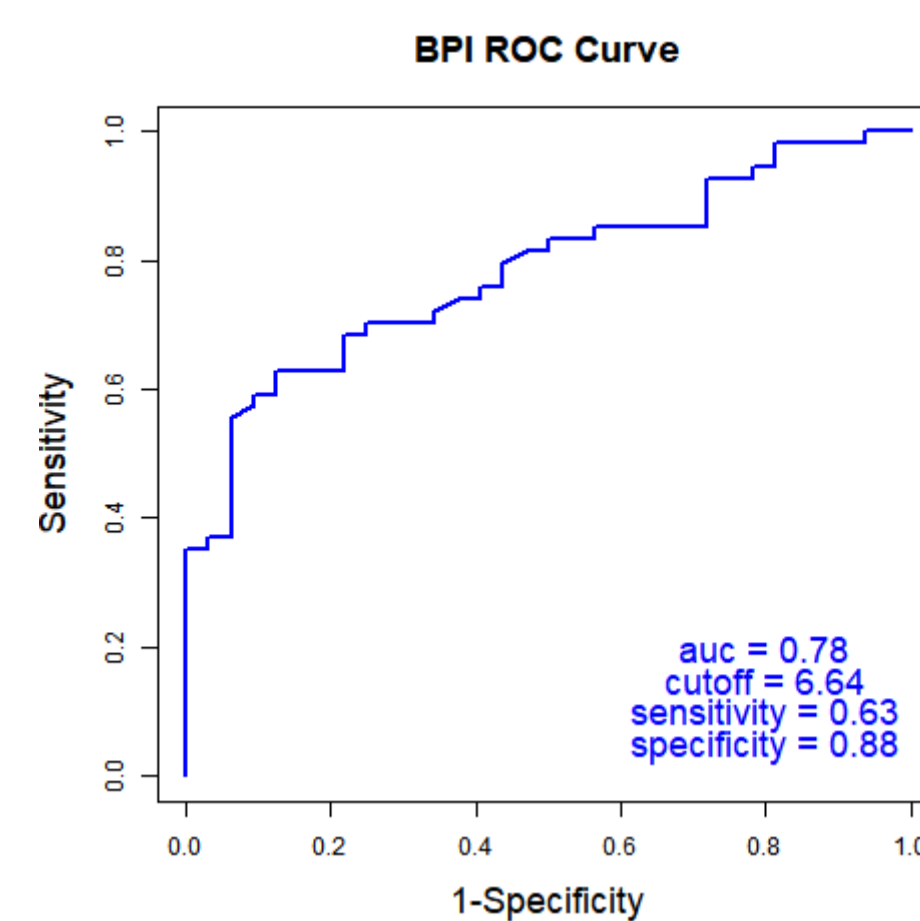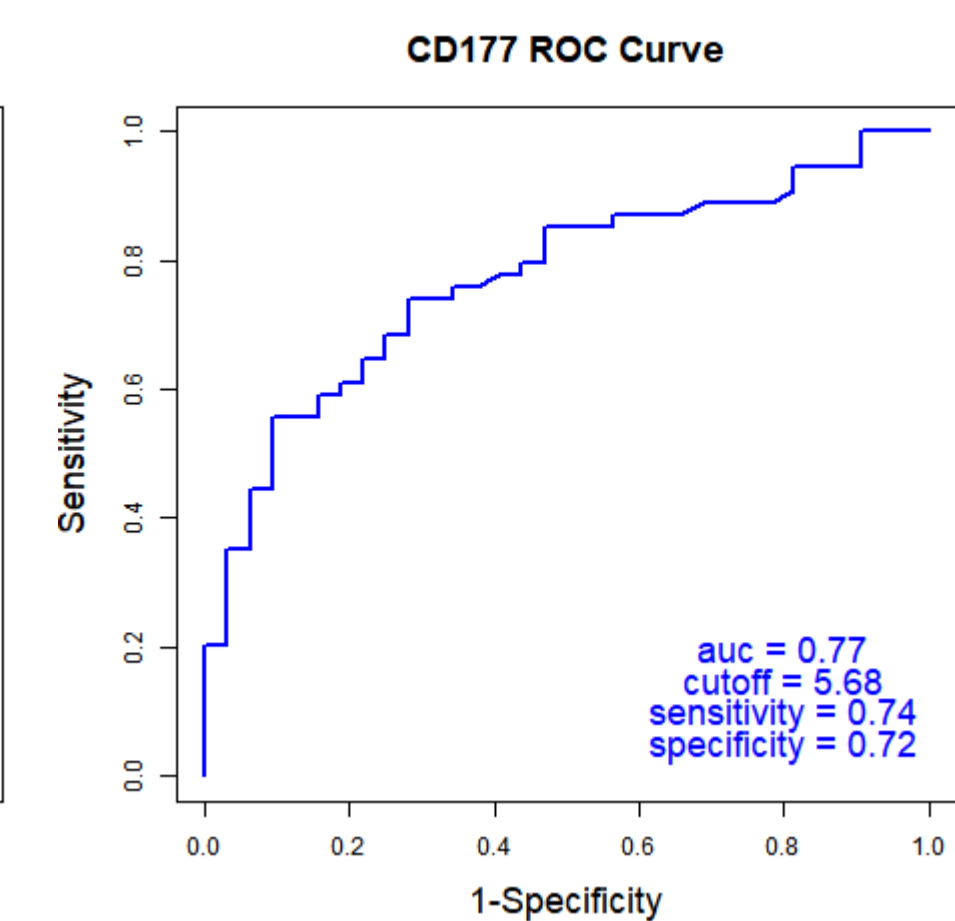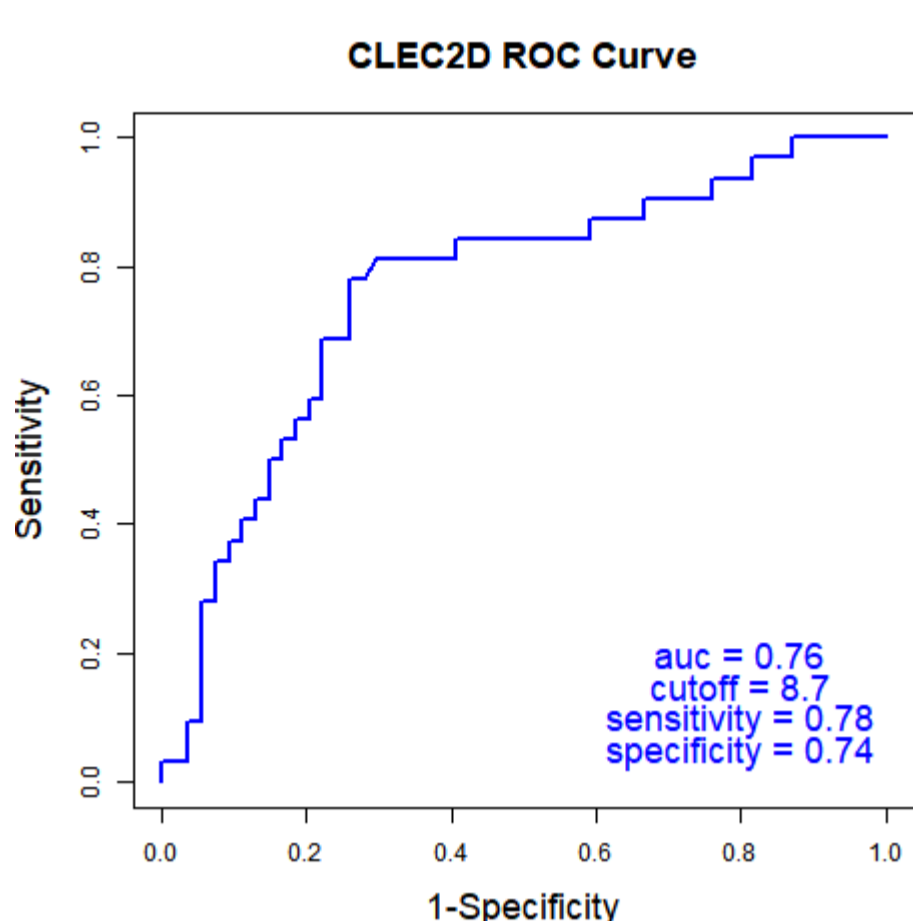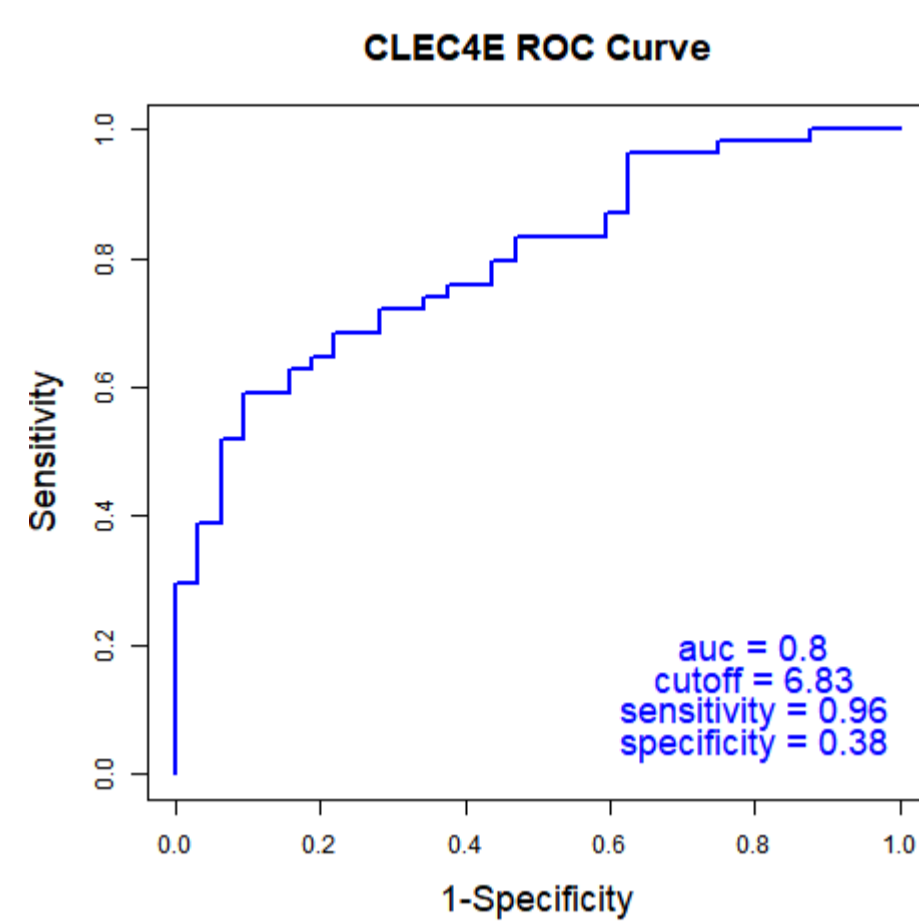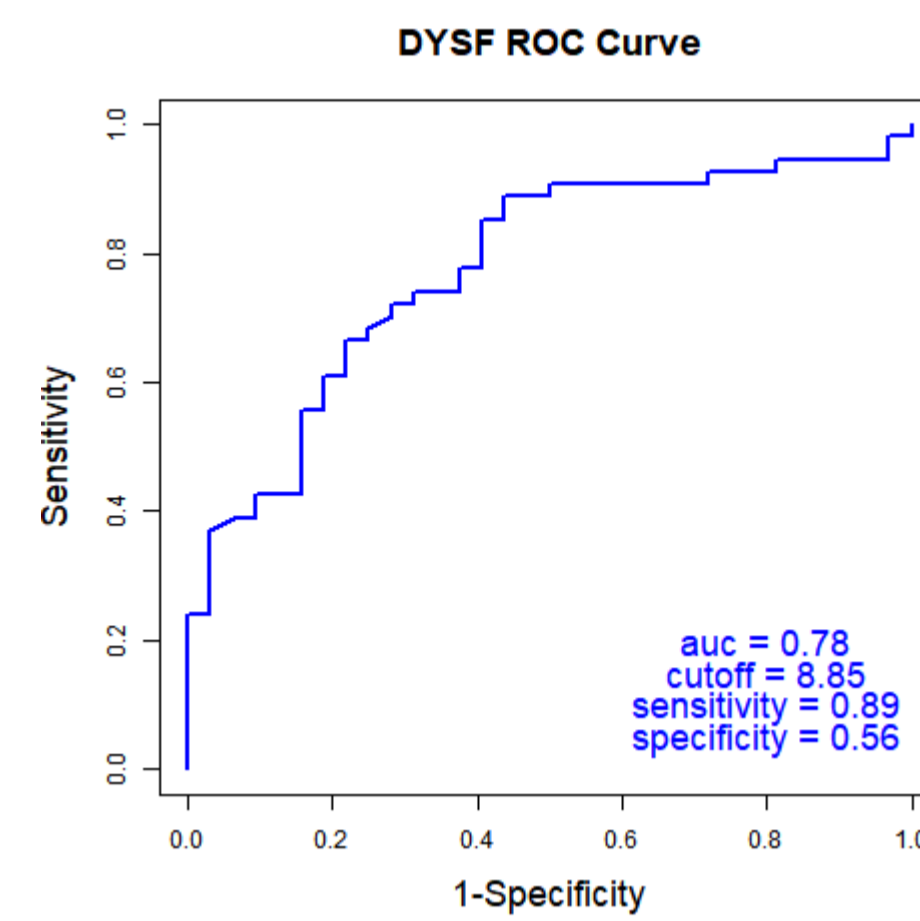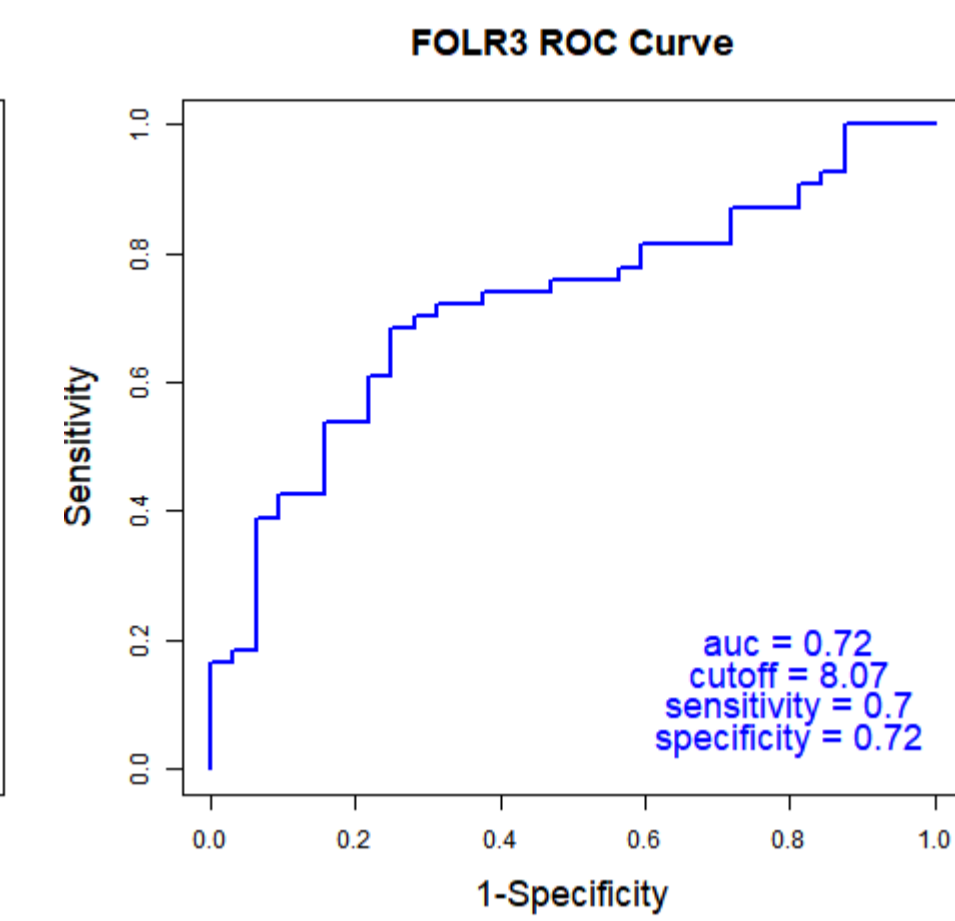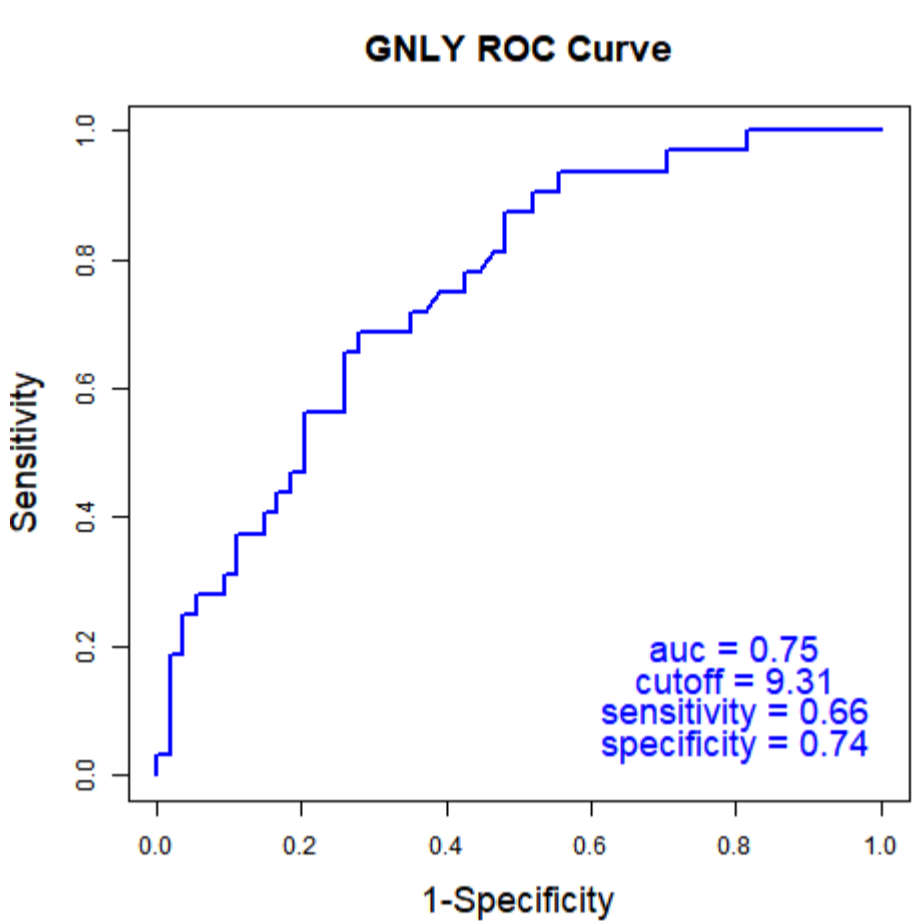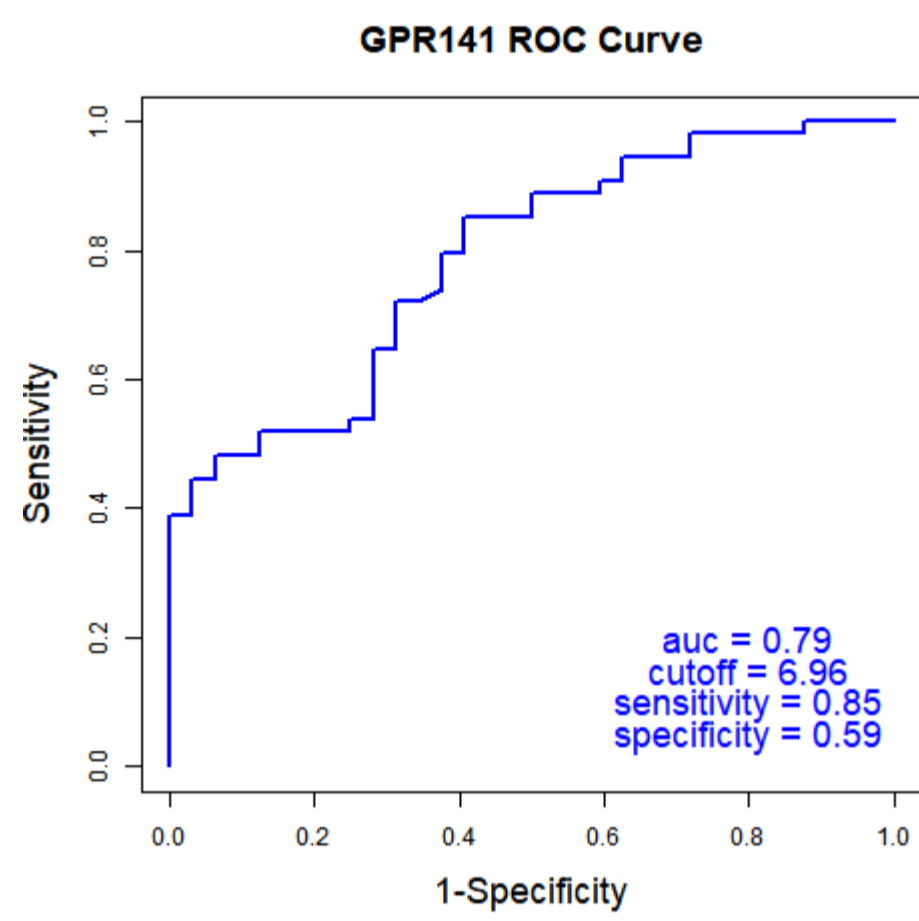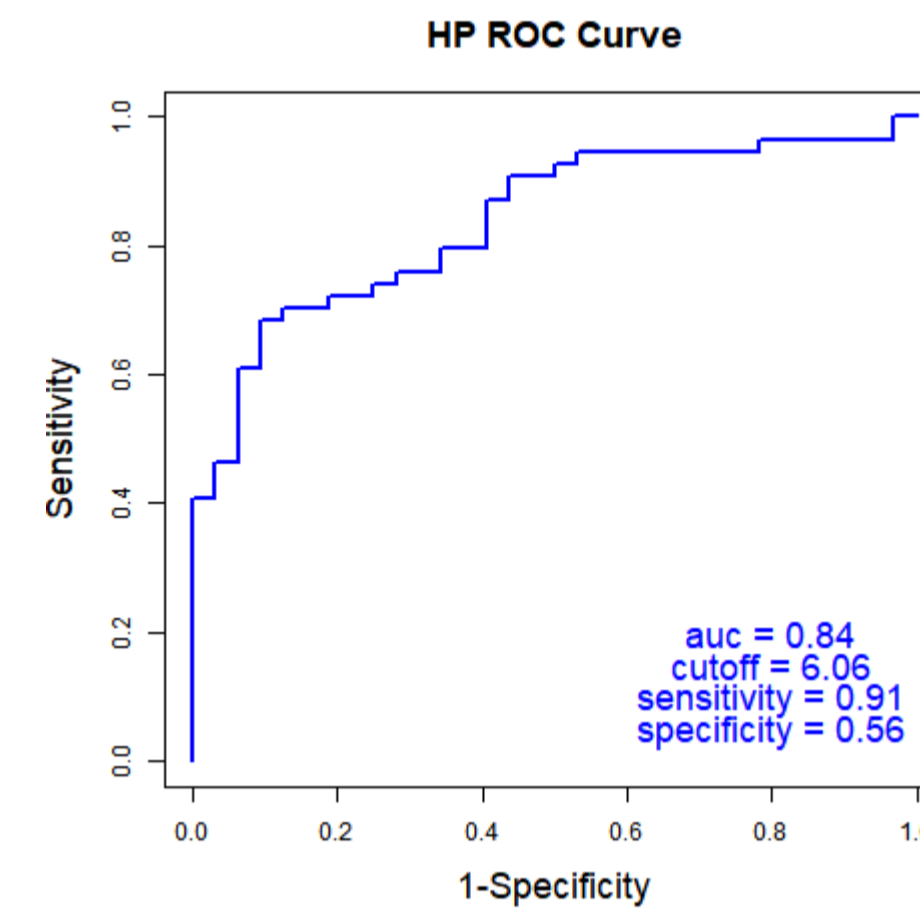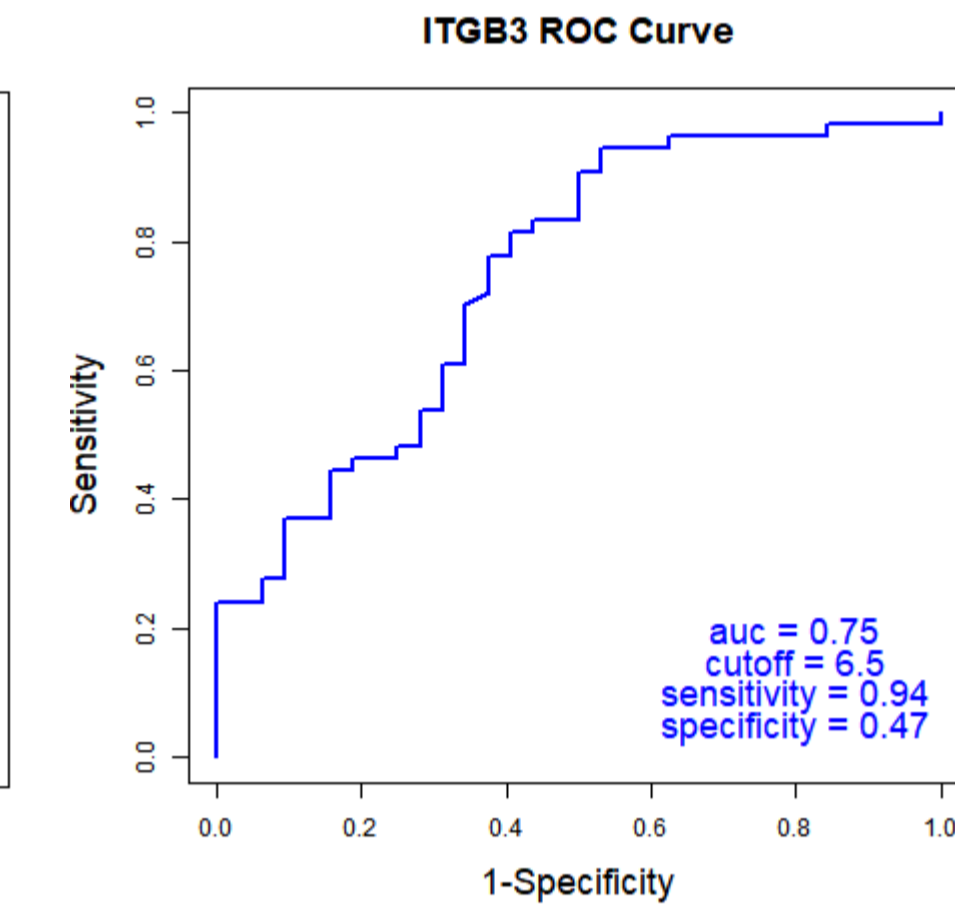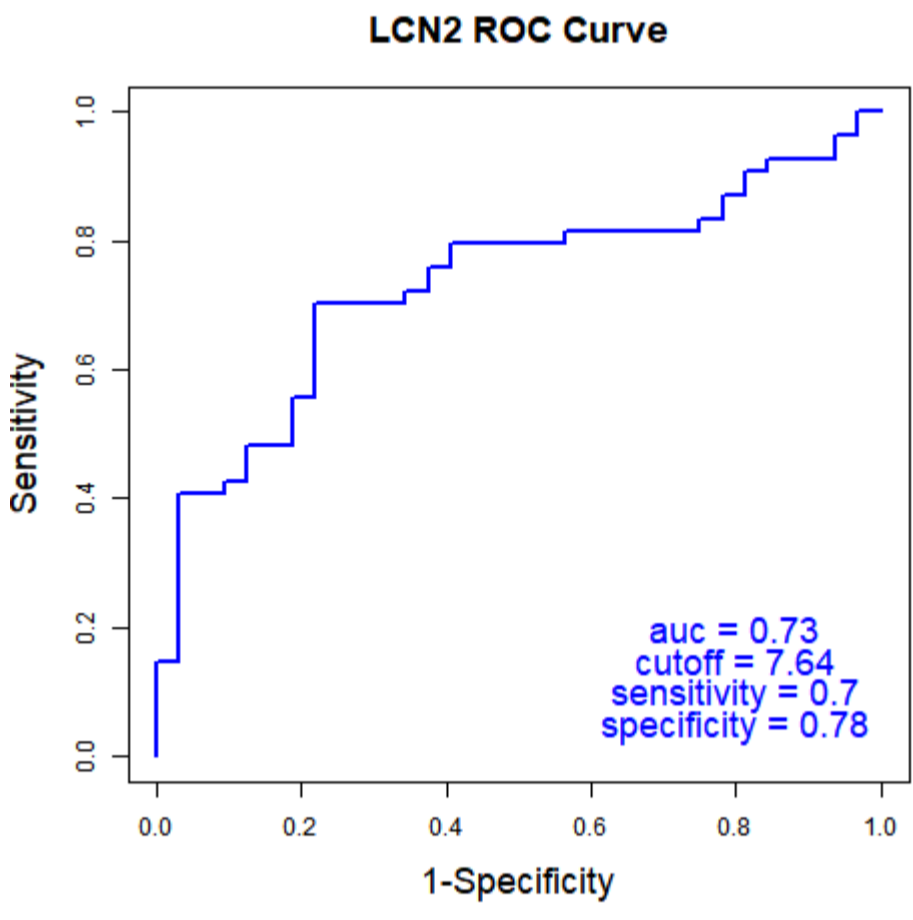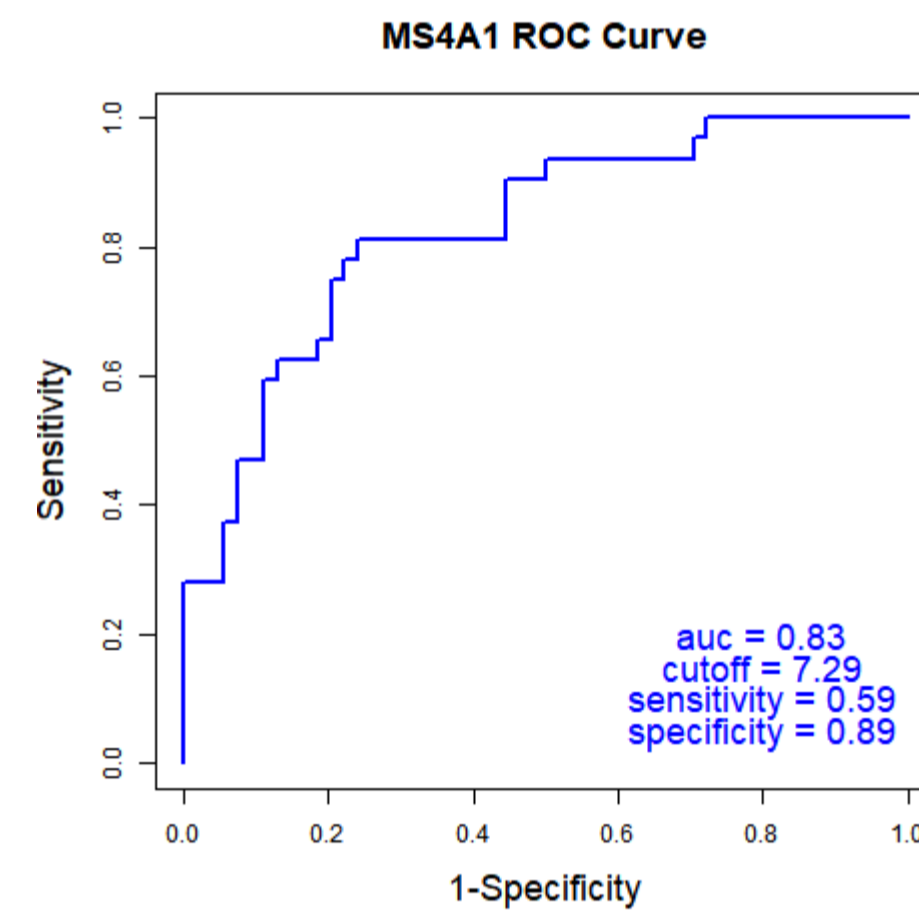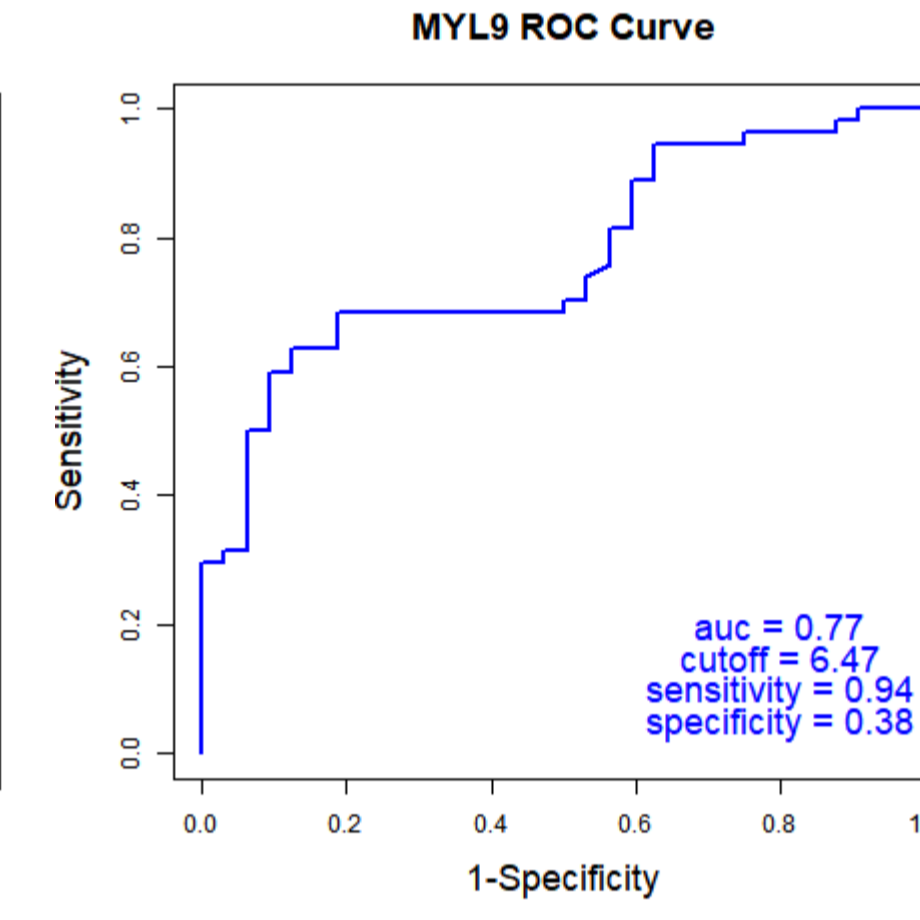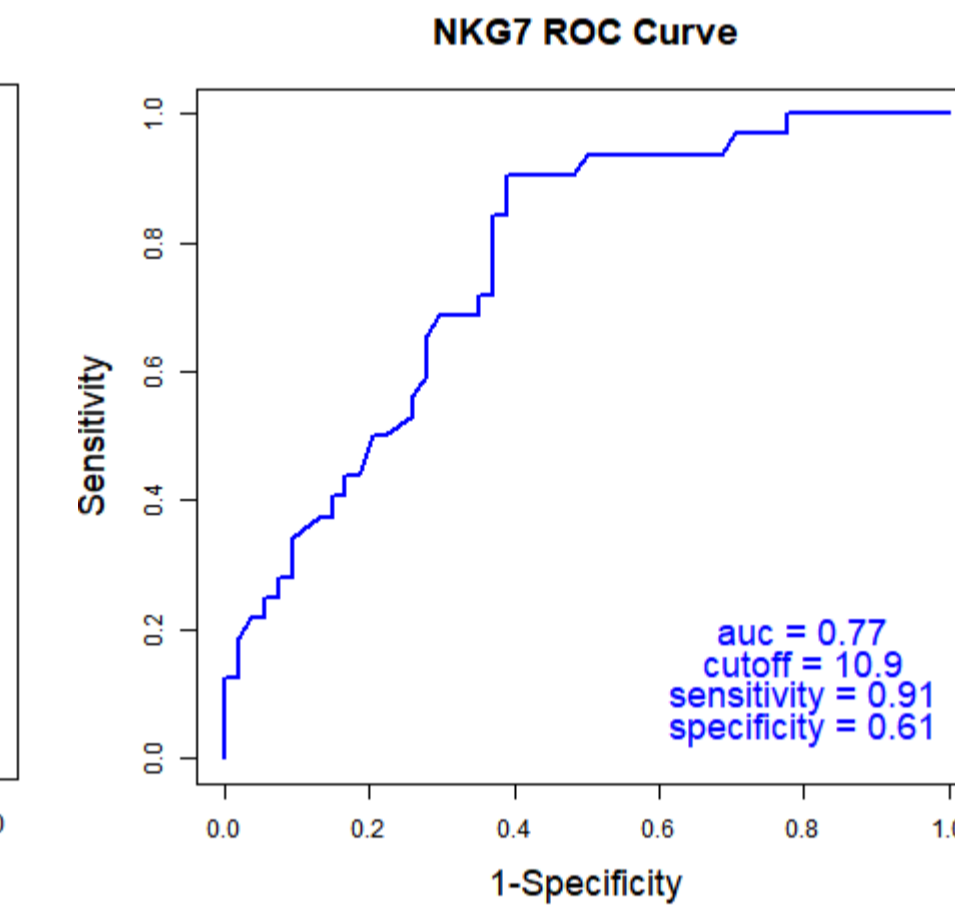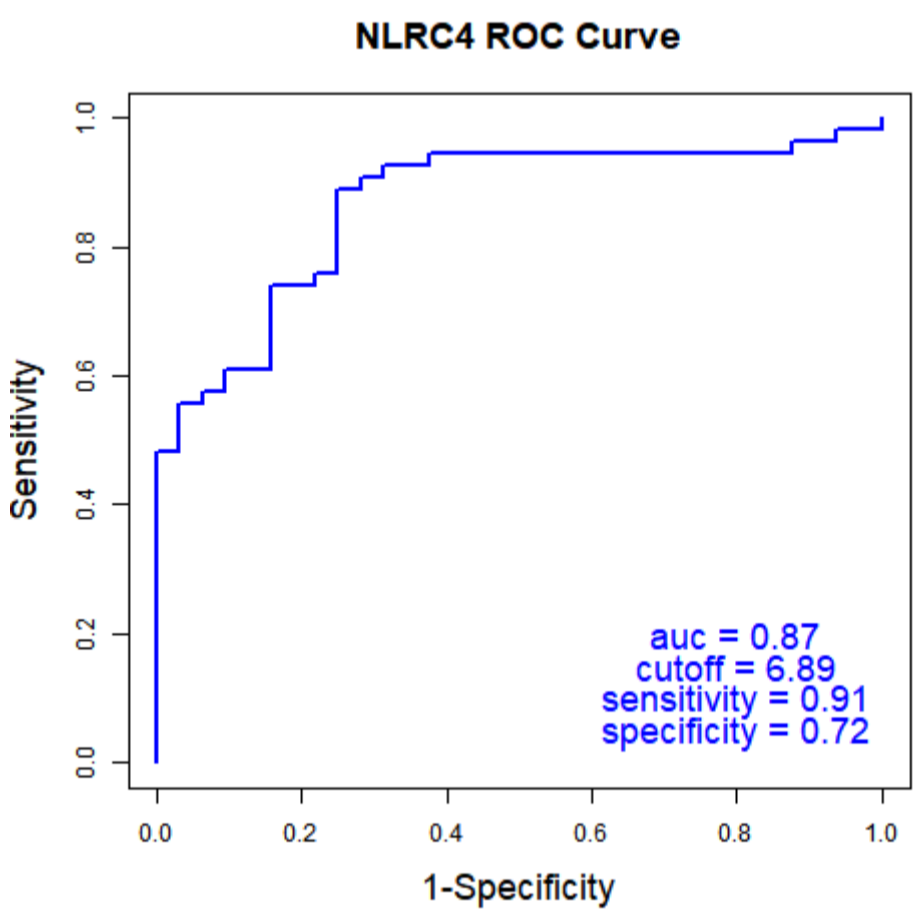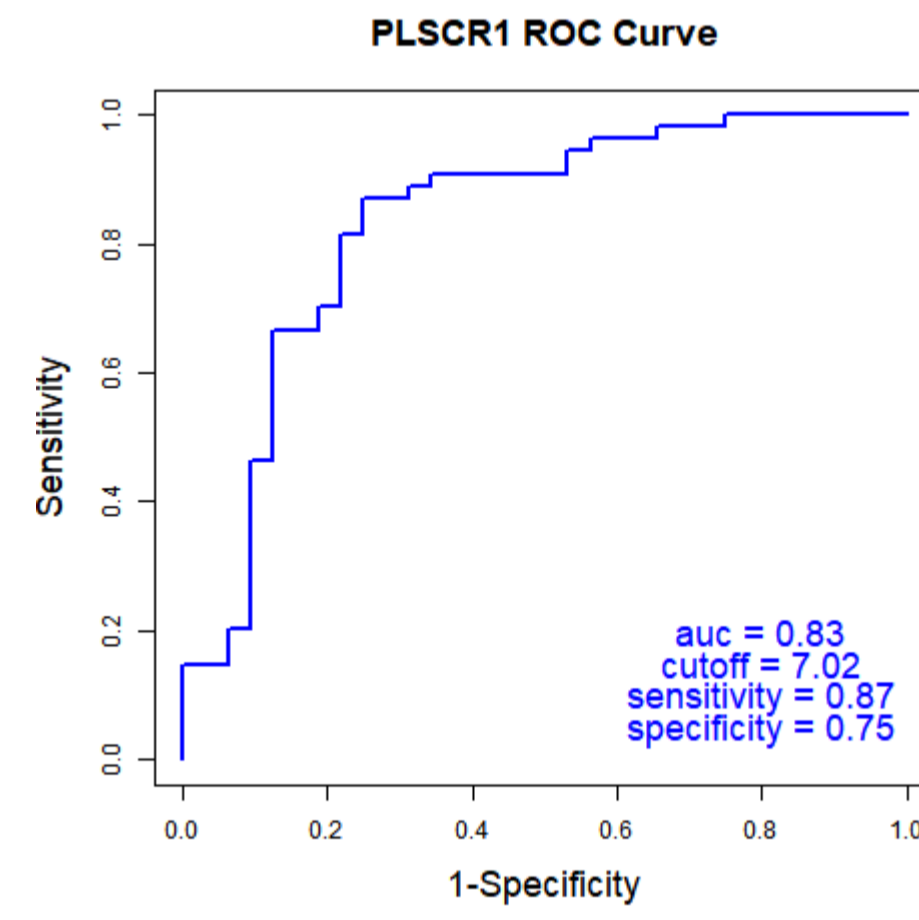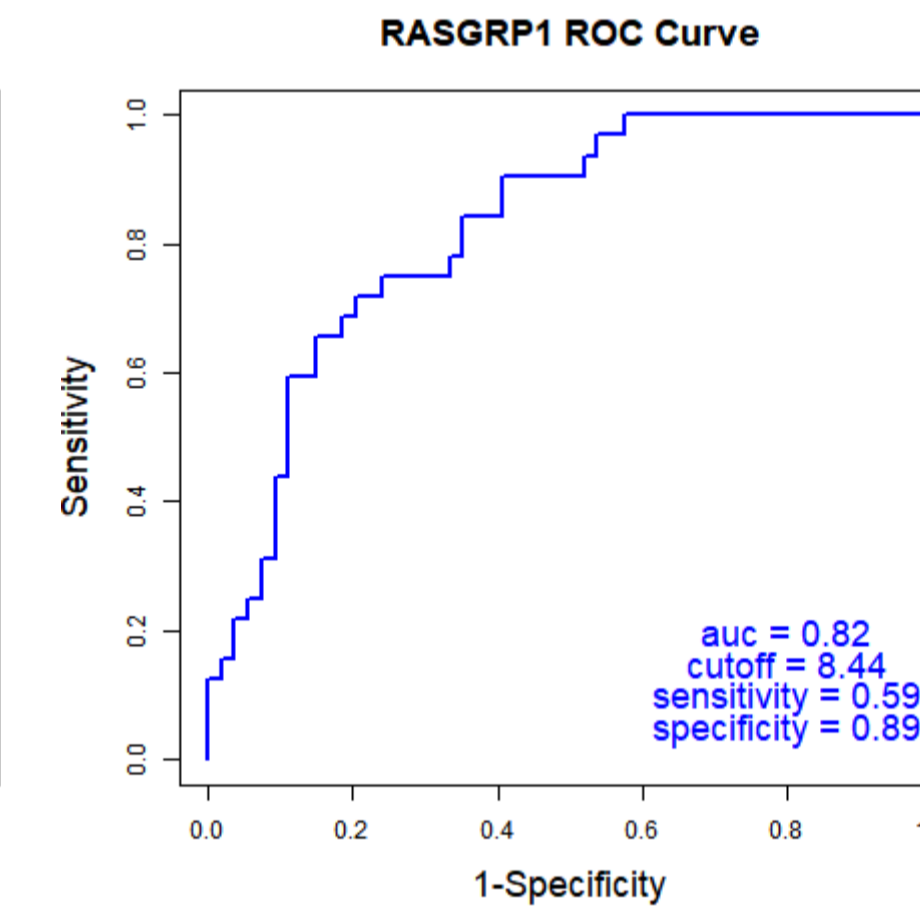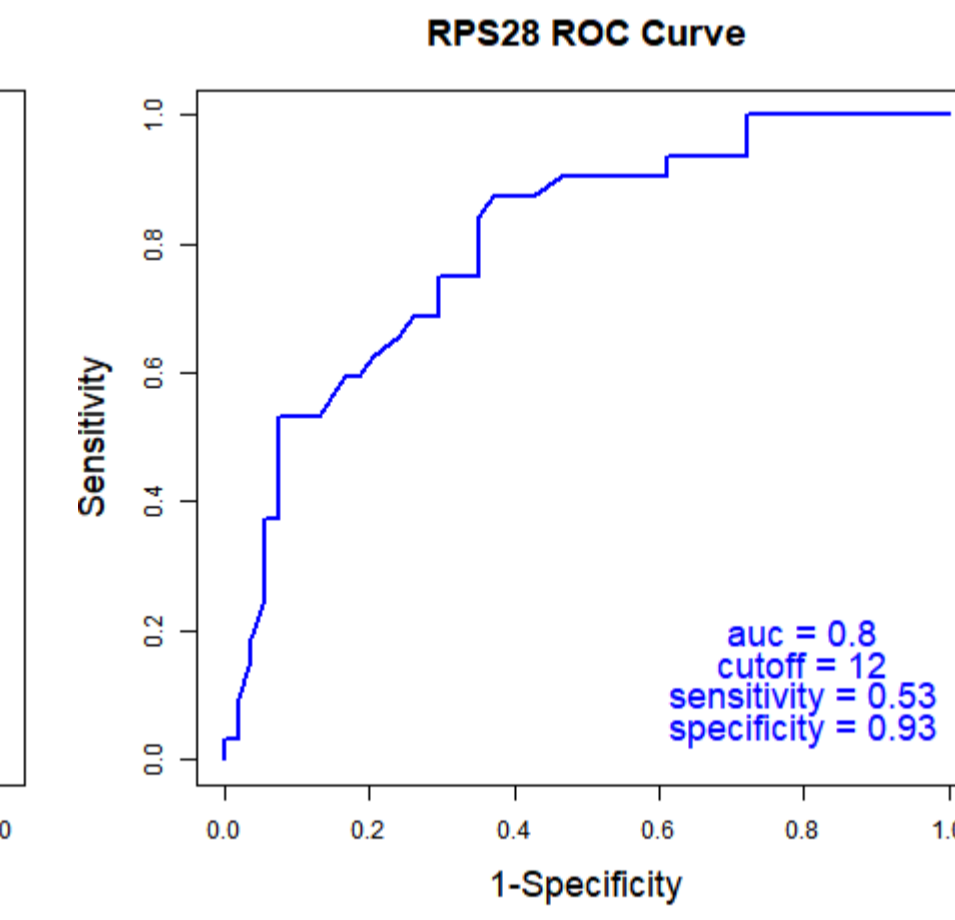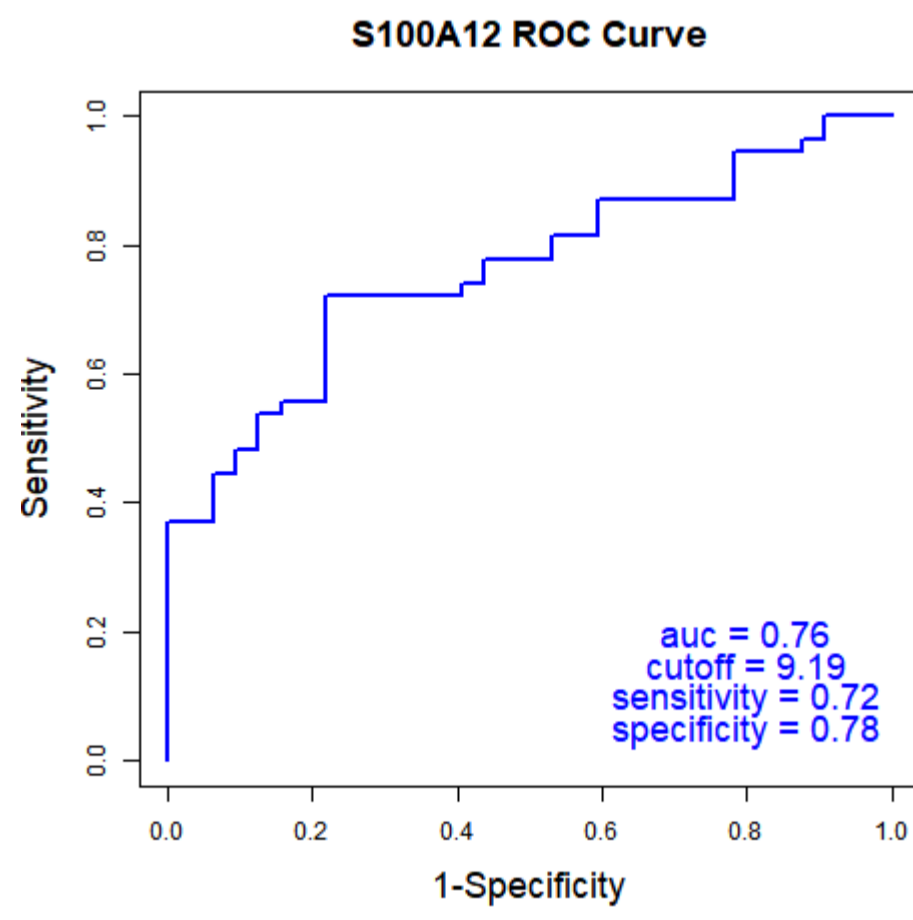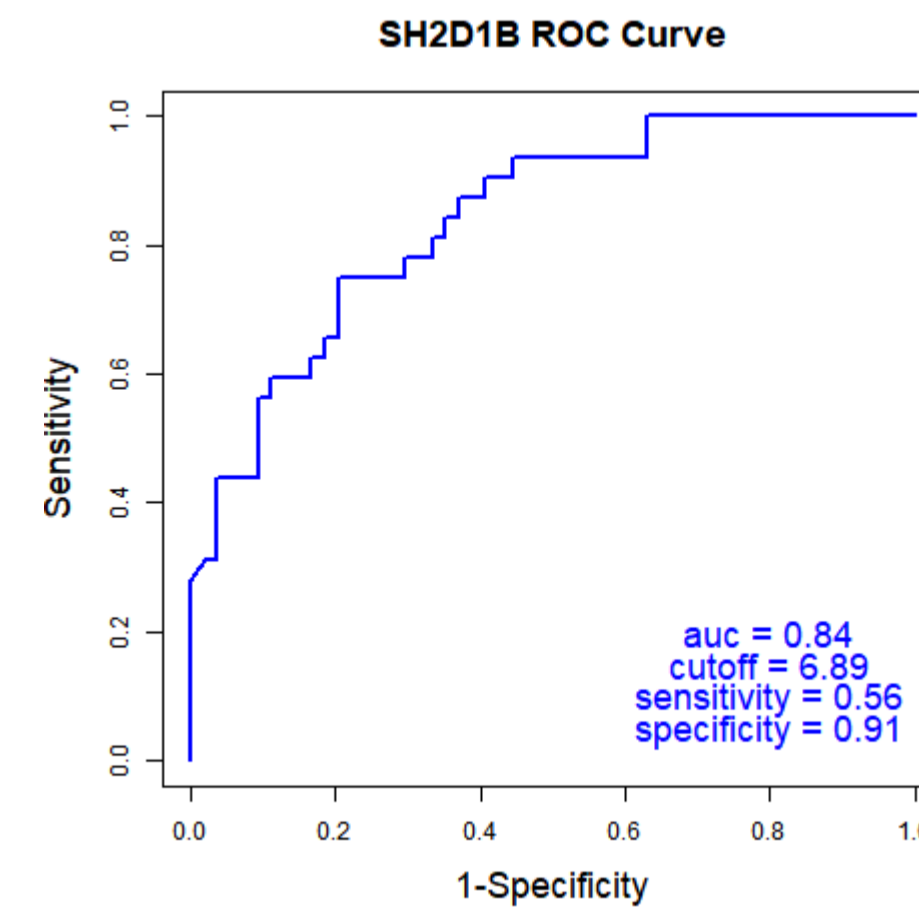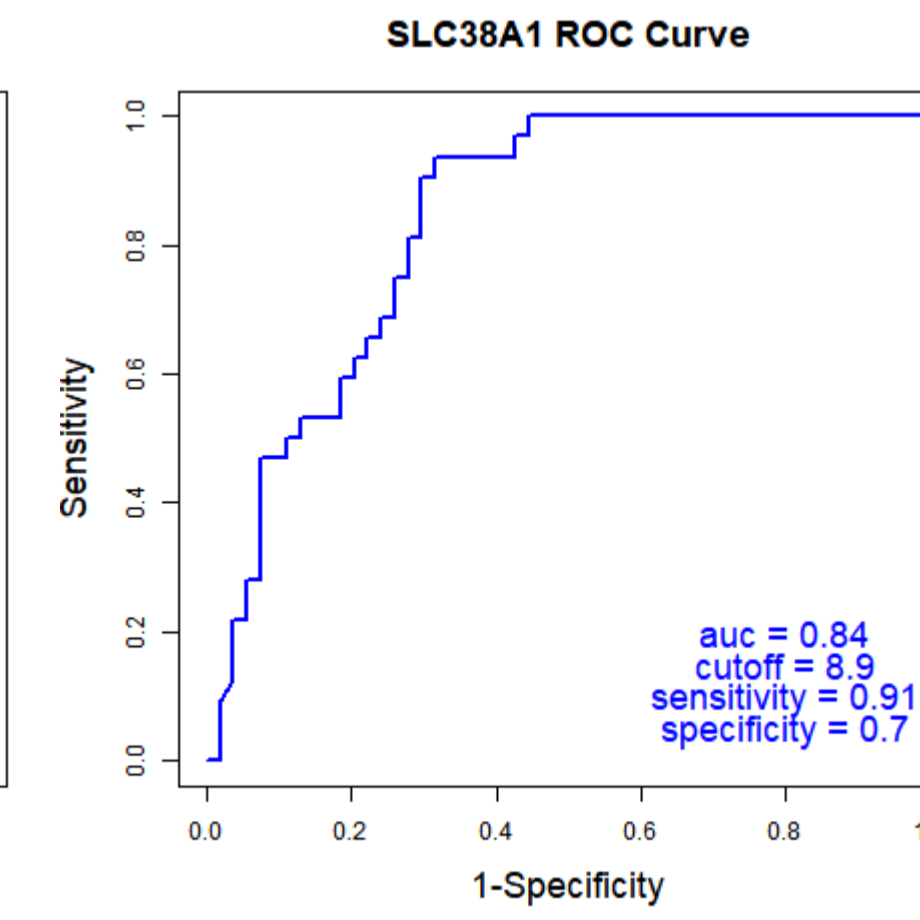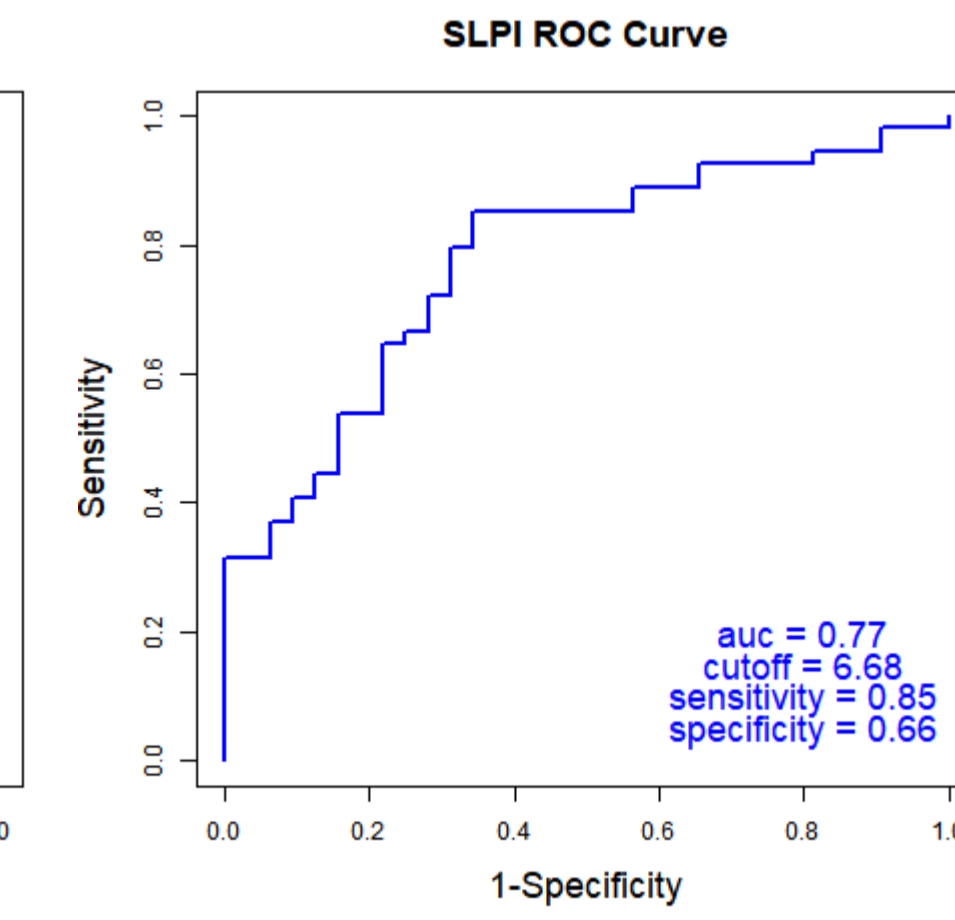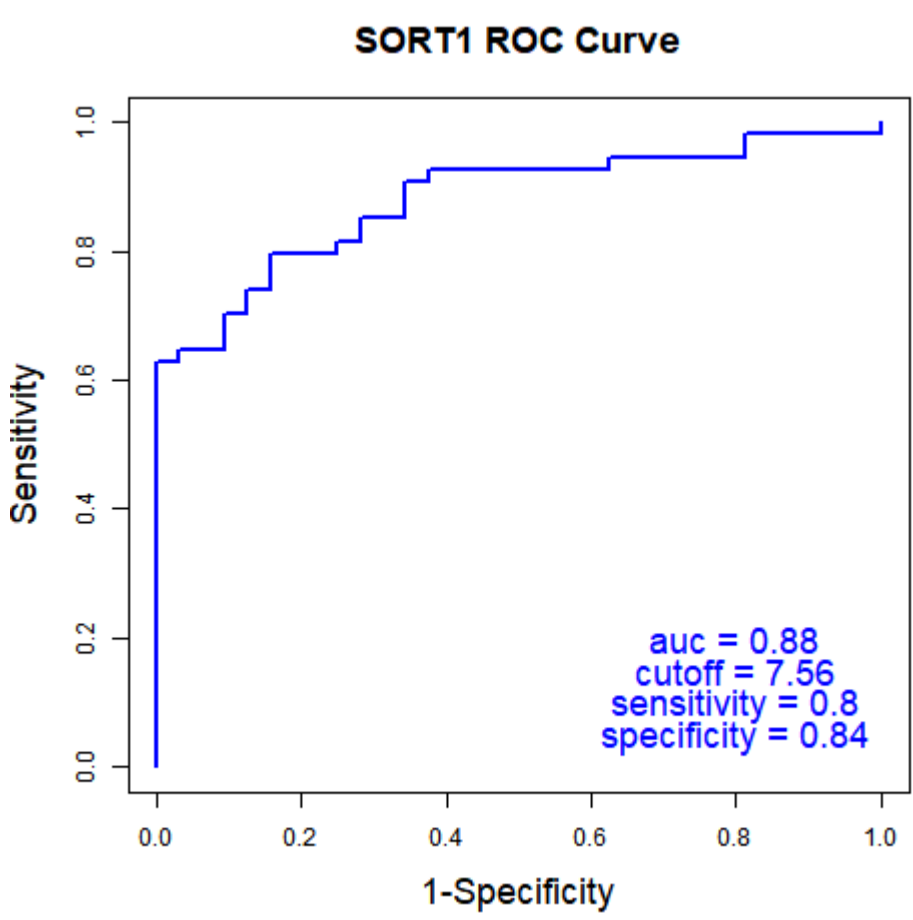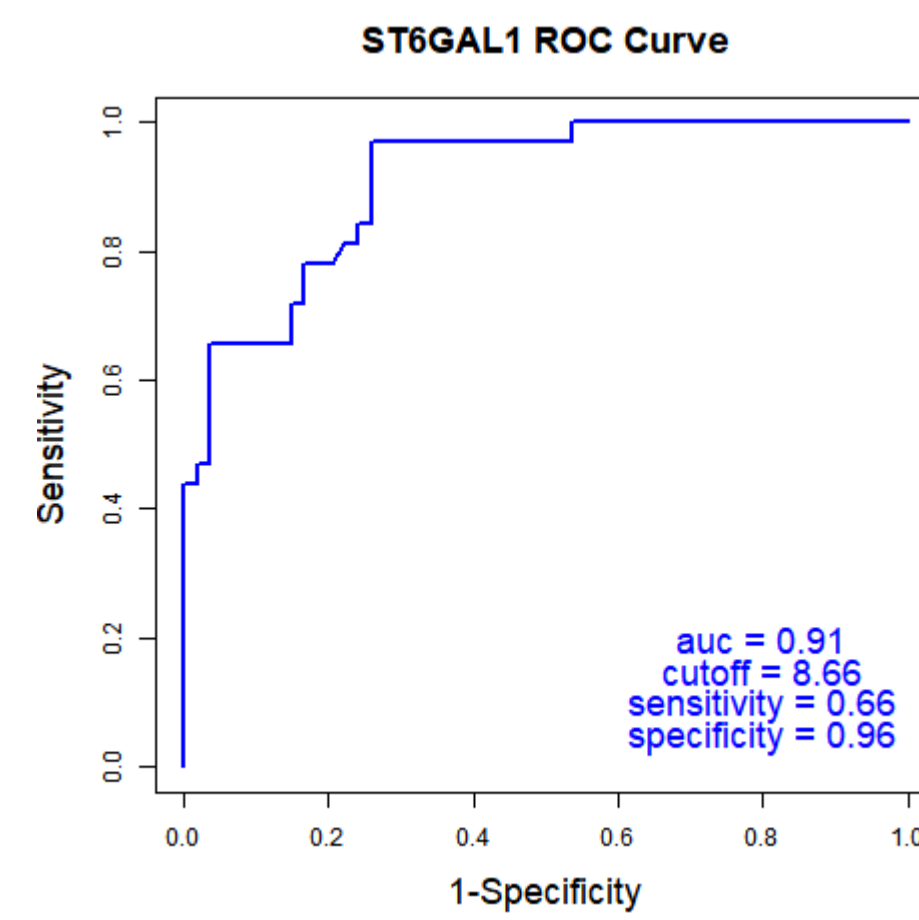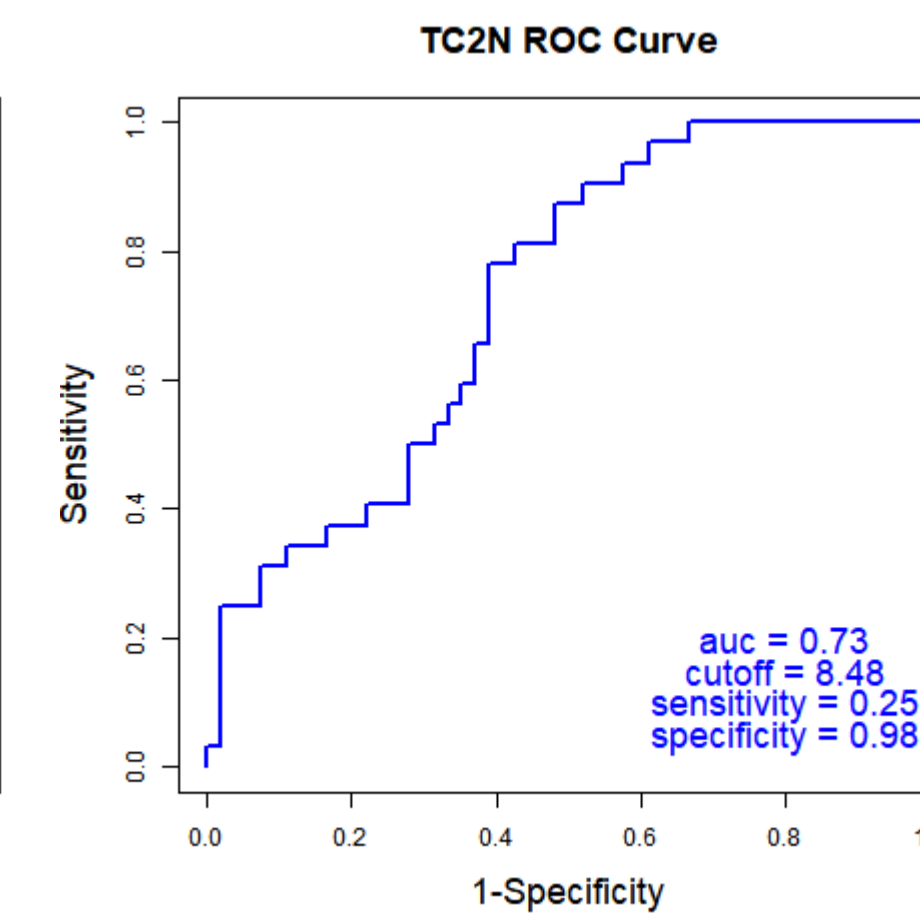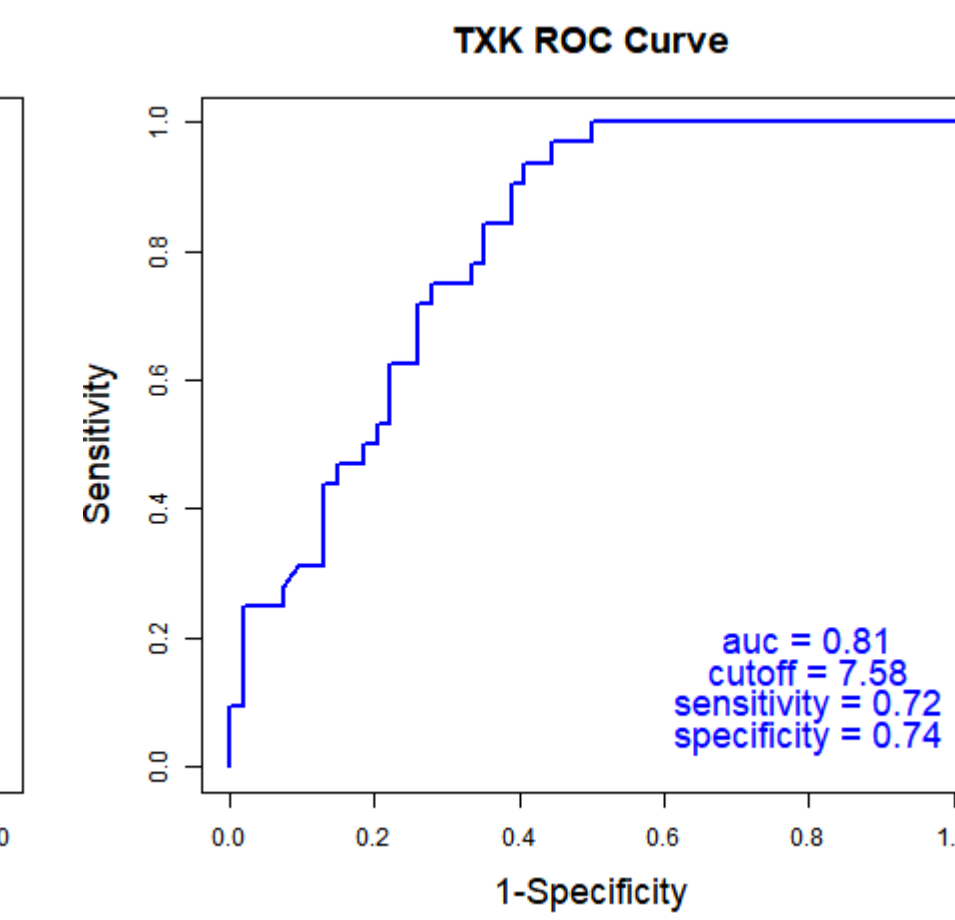

Supplement: pone.0194844.s004.pdf [file pone.0194844.s004.pdf]
