# Supplementary material for: Integrative multi-platform meta-analysis of gene expression profiles in pancreatic ductal adenocarcinoma patients for identifying novel diagnostic biomarkers
Source: PubMed Central journal article supplement (PMC5884535; doi:10.1371/journal.pone.0194844), 2018-04-04
Supplement: pone.0194844.s006.pdf [file pone.0194844.s006.pdf]

| <b>S1 Table. Remaining differentially expressed genes in individual Illumina and the integrative meta-analysis.</b> |               |                                                                      |              |                  |          |           |
|---------------------------------------------------------------------------------------------------------------------|---------------|----------------------------------------------------------------------|--------------|------------------|----------|-----------|
| <b>ENTREZ</b>                                                                                                       | <b>SYMBOL</b> | <b>GENENAME</b>                                                      | <b>logFC</b> | <b>adj.P.Val</b> | <b>B</b> | <b>FC</b> |
| 4318                                                                                                                | MMP9          | matrix metalloproteinase 9                                           | 1.12         | 1.91E-04         | 3.49     | 2.18      |
| 3560                                                                                                                | IL2RB         | interleukin 2 receptor, beta                                         | -0.98        | 5.50E-07         | 10.88    | -1.96     |
| 3575                                                                                                                | IL7R          | interleukin 7 receptor                                               | -0.96        | 5.80E-07         | 10.71    | -1.96     |
| 3945                                                                                                                | LDHB          | lactate dehydrogenase B                                              | -0.96        | 5.64E-05         | 5.01     | -1.92     |
| 1236                                                                                                                | CCR7          | chemokine (C-C motif) receptor 7                                     | -0.95        | 3.79E-07         | 11.39    | -1.92     |
| 353514                                                                                                              | LILRA5        | leukocyte immunoglobulin-like receptor, subfamily A, member 5        | 0.91         | 5.69E-06         | 7.83     | 1.89      |
| 23569                                                                                                               | PADI4         | peptidyl arginine deiminase, type IV                                 | 0.88         | 8.34E-07         | 10.23    | 1.83      |
| 973                                                                                                                 | CD79A         | CD79a molecule, immunoglobulin-associated alpha                      | -0.86        | 1.10E-05         | 7.08     | -1.82     |
| 51176                                                                                                               | LEF1          | lymphoid enhancer-binding factor 1                                   | -0.86        | 5.50E-07         | 10.82    | -1.82     |
| 6191                                                                                                                | RPS4X         | ribosomal protein S4, X-linked                                       | -0.83        | 6.19E-04         | 1.98     | -1.79     |
| 3820                                                                                                                | KLRB1         | killer cell lectin-like receptor subfamily B, member 1               | -0.8         | 2.71E-07         | 11.89    | -1.75     |
| 5583                                                                                                                | PRKCH         | protein kinase C, eta                                                | -0.76        | 5.18E-08         | 13.9     | -1.69     |
| 2205                                                                                                                | FCER1A        | Fc fragment of IgE, high affinity I, receptor for; alpha polypeptide | -0.74        | 8.77E-07         | 10.1     | -1.67     |
| 3674                                                                                                                | ITGA2B        | integrin, alpha 2b                                                   | 0.74         | 8.40E-05         | 4.56     | 1.67      |
| 916                                                                                                                 | CD3E          | CD3e molecule, epsilon                                               | -0.74        | 8.77E-07         | 10.1     | -1.67     |
| 7850                                                                                                                | IL1R2         | interleukin 1 receptor, type II                                      | 0.73         | 5.43E-04         | 2.15     | 1.66      |
| 939                                                                                                                 | CD27          | CD27 molecule                                                        | -0.72        | 5.18E-08         | 13.95    | -1.64     |
| 3702                                                                                                                | ITK           | IL2-inducible T-cell kinase                                          | -0.7         | 1.41E-06         | 9.56     | -1.61     |
| 2113                                                                                                                | ETS1          | v-ets avian erythroblastosis virus E26 oncogene homolog 1            | -0.69        | 1.11E-03         | 1.22     | -1.61     |
| 762                                                                                                                 | CA4           | carbonic anhydrase IV                                                | 0.67         | 2.92E-06         | 8.64     | 1.60      |
| 10410                                                                                                               | IFITM3        | interferon induced transmembrane protein 3                           | 0.67         | 2.80E-03         | 0.15     | 1.59      |
| 1462                                                                                                                | VCAN          | versican                                                             | 0.66         | 1.09E-04         | 4.23     | 1.58      |
| 340205                                                                                                              | TREML1        | triggering receptor expressed on myeloid cells-like 1                | 0.66         | 7.55E-04         | 1.7      | 1.58      |
| 6194                                                                                                                | RPS6          | ribosomal protein S6                                                 | -0.66        | 1.59E-04         | 3.74     | -1.59     |
| 3101                                                                                                                | HK3           | hexokinase 3                                                         | 0.65         | 4.33E-06         | 8.14     | 1.57      |
| 2162                                                                                                                | F13A1         | coagulation factor XIII, A1 polypeptide                              | 0.64         | 3.38E-03         | -0.09    | 1.55      |
| 6556                                                                                                                | SLC11A1       | solute carrier family 11, member 1                                   | 0.62         | 9.55E-04         | 1.41     | 1.54      |
| 5610                                                                                                                | EIF2AK2       | eukaryotic translation initiation factor 2-alpha kinase 2            | 0.62         | 5.07E-05         | 5.19     | 1.54      |
| 919                                                                                                                 | CD247         | CD247 molecule                                                       | -0.6         | 5.64E-07         | 10.76    | -1.52     |
| 3003                                                                                                                | GZMK          | granzyme K                                                           | -0.6         | 1.78E-04         | 3.59     | -1.52     |
