# Supplementary material for: Integrative multi-platform meta-analysis of gene expression profiles in pancreatic ductal adenocarcinoma patients for identifying novel diagnostic biomarkers
Source: PubMed Central journal article supplement (PMC5884535; doi:10.1371/journal.pone.0194844), 2018-04-04
Supplement: pone.0194844.s007.pdf [file pone.0194844.s007.pdf]

**S2 Table. Remaining differentially expressed genes in individual Affymetrix and the integrative meta-analysis.**

| ENTREZ | SYMBOL  | GENENAME                                     | logFC | adj.P.Val | B     | FC    |
|--------|---------|----------------------------------------------|-------|-----------|-------|-------|
| 6279   | S100A8  | S100 calcium binding protein A8              | 0.93  | 8.20E-05  | 4.59  | 1.90  |
| 118932 | ANKRD22 | ankyrin repeat domain 22                     | 0.86  | 6.22E-08  | 13.67 | 1.81  |
| 8876   | VNN1    | vanin 1                                      | 0.84  | 4.07E-07  | 11.29 | 1.79  |
| 2153   | F5      | coagulation factor V                         | 0.77  | 5.22E-09  | 16.89 | 1.71  |
| 383    | ARG1    | arginase 1                                   | 0.71  | 3.45E-04  | 2.72  | 1.64  |
| 54674  | LRRN3   | leucine rich repeat neuronal 3               | -0.71 | 7.24E-06  | 7.56  | -1.64 |
| 64757  | MARC1   | mitochondrial amidoxime reducing component 1 | 0.66  | 5.50E-07  | 10.84 | 1.58  |
| 338339 | CLEC4D  | C-type lectin domain family 4, member D      | 0.6   | 1.55E-04  | 3.79  | 1.52  |
| 115352 | FCRL3   | Fc receptor-like 3                           | -0.59 | 5.84E-11  | 22.01 | -1.49 |
