# Supplementary material for: Integrative multi-platform meta-analysis of gene expression profiles in pancreatic ductal adenocarcinoma patients for identifying novel diagnostic biomarkers
Source: PubMed Central journal article supplement (PMC5884535; doi:10.1371/journal.pone.0194844), 2018-04-04
Supplement: pone.0194844.s008.pdf [file pone.0194844.s008.pdf]

**S3 Table. Differentially expressed genes in the integrative meta-analysis but not in individual analysis (gained genes)**

| ENTREZ | SYMBOL  | GENENAME                                             | logFC | adj.P.Val | B     | FC    |
|--------|---------|------------------------------------------------------|-------|-----------|-------|-------|
| 57126  | CD177   | CD177 molecule                                       | 1.02  | 7.32E-04  | 1.75  | 2.02  |
| 6283   | S100A12 | S100 calcium binding protein A12                     | 0.93  | 1.98E-04  | 3.44  | 1.91  |
| 3690   | ITGB3   | integrin, beta 3                                     | 0.84  | 6.56E-04  | 1.88  | 1.79  |
| 3240   | HP      | haptoglobin                                          | 0.82  | 2.37E-05  | 6.13  | 1.76  |
| 306    | ANXA3   | annexin A3                                           | 0.81  | 1.06E-04  | 4.25  | 1.76  |
| 931    | MS4A1   | membrane-spanning 4-domains, subfamily A, member 1   | -0.8  | 1.64E-06  | 9.35  | -1.72 |
| 671    | BPI     | bactericidal/permeability-increasing protein         | 0.73  | 7.89E-04  | 1.65  | 1.66  |
| 10578  | GNLY    | granulysin                                           | -0.72 | 3.88E-04  | 2.57  | -1.64 |
| 123036 | TC2N    | tandem C2 domains, nuclear                           | -0.72 | 1.85E-03  | 0.62  | -1.64 |
| 6234   | RPS28   | ribosomal protein S28                                | -0.68 | 4.68E-05  | 5.28  | -1.61 |
| 4818   | NKG7    | natural killer cell granule protein 7                | -0.68 | 1.76E-04  | 3.61  | -1.61 |
| 3934   | LCN2    | lipocalin 2                                          | 0.68  | 6.22E-03  | -0.85 | 1.60  |
| 29121  | CLEC2D  | C-type lectin domain family 2, member D              | -0.66 | 2.69E-04  | 3.02  | -1.59 |
| 2352   | FOLR3   | folate receptor 3 (gamma)                            | 0.66  | 1.94E-03  | 0.57  | 1.58  |
| 7294   | TXK     | TXK tyrosine kinase                                  | -0.66 | 3.82E-05  | 5.53  | -1.59 |
| 10125  | RASGRP1 | RAS guanyl releasing protein 1                       | -0.65 | 3.06E-06  | 8.56  | -1.56 |
| 5359   | PLSCR1  | phospholipid scramblase 1                            | 0.64  | 3.12E-07  | 11.68 | 1.56  |
| 6590   | SLPI    | secretory leukocyte peptidase inhibitor              | 0.64  | 8.20E-04  | 1.6   | 1.55  |
| 6480   | ST6GAL1 | ST6 beta-galactosamide alpha-2,6-sialyltransferase 1 | -0.63 | 3.60E-10  | 19.99 | -1.56 |
| 10398  | MYL9    | myosin, light chain 9, regulatory                    | 0.62  | 2.33E-04  | 3.22  | 1.53  |
| 81539  | SLC38A1 | solute carrier family 38, member 1                   | -0.62 | 1.11E-05  | 7.06  | -1.54 |
| 26253  | CLEC4E  | C-type lectin domain family 4, member E              | 0.61  | 2.92E-05  | 5.89  | 1.53  |
| 117157 | SH2D1B  | SH2 domain containing 1B                             | -0.61 | 5.50E-07  | 10.86 | -1.52 |
| 6844   | VAMP2   | vesicle-associated membrane protein 2                | -0.61 | 3.02E-06  | 8.6   | -1.52 |
| 353345 | GPR141  | G protein-coupled receptor 141                       | 0.6   | 4.77E-05  | 5.25  | 1.51  |
| 58484  | NLRC4   | NLR family, CARD domain containing 4                 | 0.59  | 2.65E-07  | 11.95 | 1.51  |
| 8291   | DYSF    | dysferlin                                            | 0.59  | 6.61E-04  | 1.87  | 1.51  |
| 6272   | SORT1   | sortilin 1                                           | 0.59  | 9.80E-08  | 13.03 | 1.50  |
