# Supplementary figures and images for: Integrative multi-platform meta-analysis of gene expression profiles in pancreatic ductal adenocarcinoma patients for identifying novel diagnostic biomarkers
Source: PLOS journal article supplement (doi:10.1371/journal.pone.0194844), 2018-04-04

# batch effect NOT removed

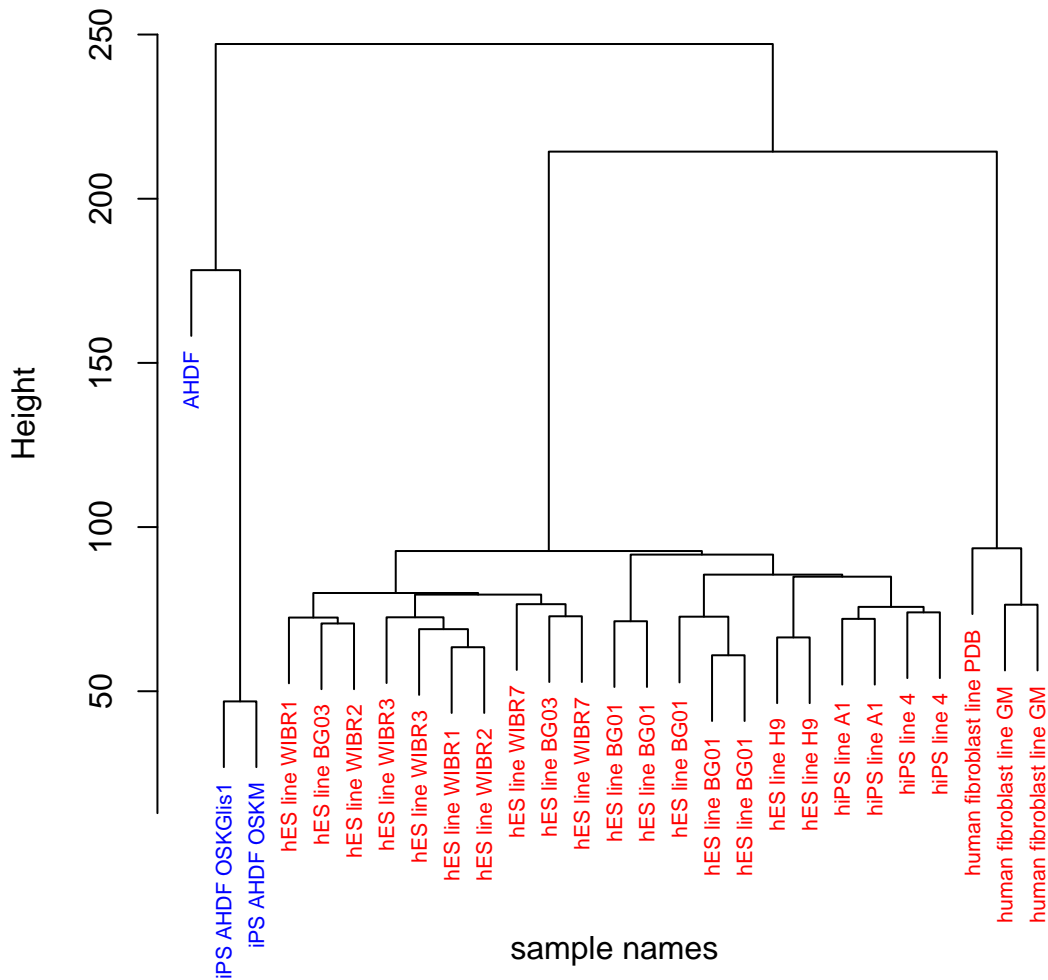

Supplement: S1 (10.1371/journal.pone.0194844.s001) [file journal.pone.0194844.s001]
